# Supplementary material for: Phase transition in CaFeAsH: bridging 1111 and 122 iron-based superconductors
Source: Royal Society of Chemistry journal article supplement (doi:10.1039/c8dt02387e), 2018-01-01
Supplement: c8dt02387e1.pdf [file c8dt02387e1.pdf]

Phase transition in CaFeAsH:  
bridging 1111 and 122 iron-based superconductors

*Yoshinori Muraba<sup>†</sup>, Soshi Iimura<sup>‡</sup>, Satoru Matsuishi<sup>†</sup>, Hidenori Hiramatsu<sup>‡</sup>*

*Takashi Honda<sup>§,¶</sup>, Kazutaka Ikeda<sup>§,¶</sup>, Toshiya Otomo,<sup>§,¶</sup> Hideo Hosono<sup>\*,†,‡</sup>*

<sup>†</sup>Materials Research Center for Element Strategy, Tokyo Institute of Technology, 4259

Nagatsuta-cho, Midori-ku, Yokohama 226-8503, Japan

<sup>‡</sup>Materials and Structures Laboratory, Tokyo Institute of Technology, 4259 Nagatsuta-

cho, Midori-ku, Yokohama 226-8503, Japan

<sup>§</sup> Institute of Materials Structure Science, High Energy Accelerator Research

Organization (KEK), Tsukuba, Ibaraki 305-0801, Japan

<sup>¶</sup> J-PARC Center, KEK, Tokai, 319-1106, Japan

Corresponding author email: [hosono@mssl.titech.ac.jp](mailto:hosono@mssl.titech.ac.jp)

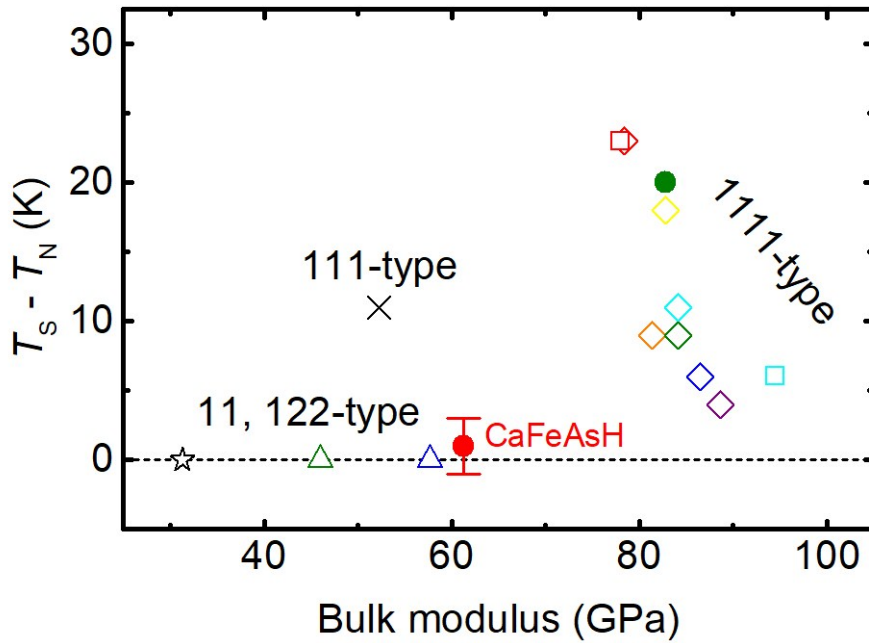

Figure S1: Plot of  $T_s - T_N$  for various stoichiometric iron-based superconductors versus their bulk modulus. Red and green circles show experimental data of CaH- and CaF-1111, respectively.<sup>1</sup> Red and light blue diamonds are La- and Sm-1111, respectively.<sup>2,3</sup> Blue and green triangles are Ba- and Sr-122.<sup>4,5</sup> Black crosses and star are NaFeAs and FeTe, respectively.<sup>6,7</sup> The calculated data of La-, Ce-, Pr-, Nd-, Sm-, Tb-, and Gd-1111 are denoted by red, orange, yellow, green, light blue, blue, and purple squares, respectively.<sup>8</sup>

References

- <sup>1</sup> H. Takahashi, T. Tomita, H. Soeda, M. Ebata, K. Okuma, T. Hanna, Y. Muraba, S. Matsuishi, and H. Hosono, *J. Supercond. Nov. Magn.* **25**, 1293 (2012).
- <sup>2</sup> G. Garbarino, P. Toulemonde, M. Álvarez-Murga, A. Sow, M. Mezouar, and M. Núñez-Regueiro, *Phys. Rev. B* **78**, 100507 (2008).
- <sup>3</sup> M. Calamiotou, D. Lampakis, E. Siranidi, J. Karpinski, N.D. Zhigadlo, and E. Liarokapis, *Phys. C Supercond.* **483**, 136 (2012).
- <sup>4</sup> W. Uhoya, A. Stemshorn, G. Tsoi, Y.K. Vohra, A.S. Sefat, B.C. Sales, K.M. Hope, and S.T. Weir, *Phys. Rev. B* **82**, 144118 (2010).
- <sup>5</sup> W.O. Uhoya, J.M. Montgomery, G.M. Tsoi, Y.K. Vohra, M.A. McGuire, A.S. Sefat, B.C. Sales, and S.T. Weir, *J. Phys. Condens. Matter* **23**, 122201 (2011).
- <sup>6</sup> Q. Liu, X. Yu, X. Wang, Z. Deng, Y. Lv, J. Zhu, S. Zhang, H. Liu, W. Yang, L. Wang, H. Mao, G. Shen, Z.-Y. Lu, Y. Ren, Z. Chen, Z. Lin, Y. Zhao, and C. Jin, *J. Am. Chem. Soc.* **133**, 7892 (2011).
- <sup>7</sup> C. Zhang, W. Yi, L. Sun, X.-J. Chen, R.J. Hemley, H. Mao, W. Lu, X. Dong, L. Bai, J. Liu, A.F. Moreira Dos Santos, J.J. Molaison, C.A. Tulk, G. Chen, N. Wang, and Z. Zhao, *Phys. Rev. B* **80**, 144519 (2009).
- <sup>8</sup> H. Li, Z. Wu, S. Zhou, S. Zhang, X. Pu, S. Yao, X. Wang, and J. Yin, *J. Alloys Compd.* **632**, 303 (2015).
